# Supplementary material for: Multidimensional cerebellar computations for flexible kinematic control of movements
Source: PubMed Central journal article supplement (PMC10156706; doi:10.1038/s41467-023-37981-0), 2023-05-03
Supplement: 41467_2023_37981_MOESM1_ESM.pdf [file 41467_2023_37981_MOESM1_ESM.pdf]

## Supplementary Material:

### Multidimensional cerebellar computations for flexible kinematic control of movements

1 Akshay Markanday\*<sup>1</sup>, Sungho Hong\*<sup>2</sup>, Junya Inoue<sup>1</sup>, Erik De Schutter<sup>2</sup>, Peter Thier<sup>1</sup>

2 1. Hertie Institute for Clinical Brain Research, University of Tübingen, Tübingen,  
3 Germany

4 2. Computational Neuroscience Unit, Okinawa Institute of Science and Technology,  
5 Okinawa, Japan

6

7 \* These authors contributed equally

8

#### 9 **Correspondence**

10 Peter Thier  
11 Cognitive Neurology Laboratory,  
12 Hertie Institute for Clinical Brain Research,  
13 Hoppe-Seyler-Str. 3, 72076  
14 Tübingen, Germany.  
15 Email: [thier@uni-tuebingen.de](mailto:thier@uni-tuebingen.de)

16

17

18

19

20

21

22

23

24

25

## Supplementary figures

26

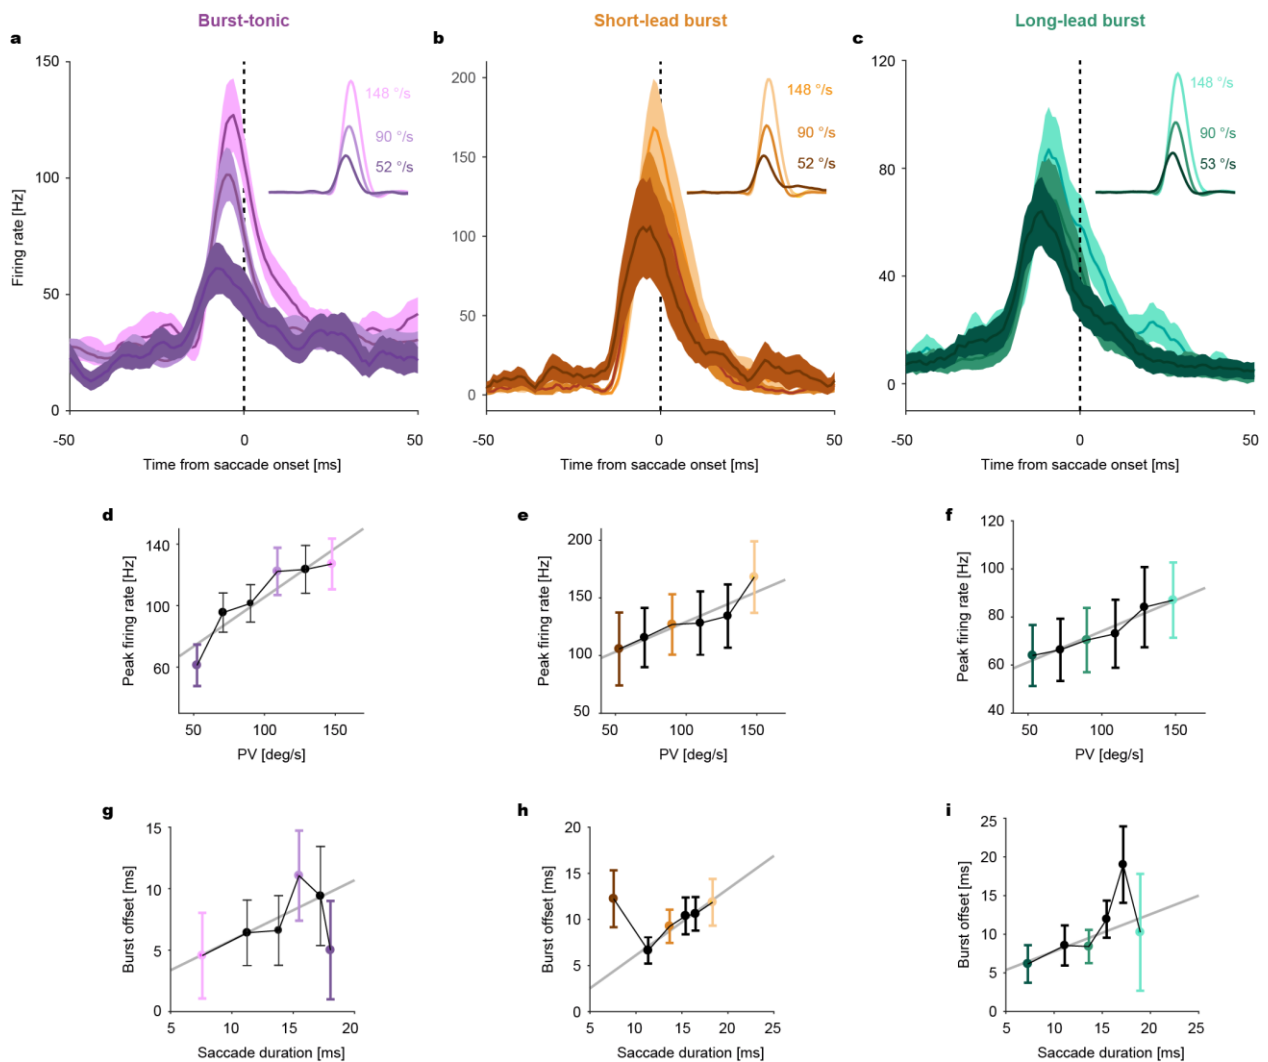

27

28

29

30

31

32

33

34

35

36

37

38

39

40

41

**Supplementary figure 1.** Linear encoding of the kinematics of microsaccades by mossy fibers (MFs). **a, b, c** Population response of burst-tonic (BT, purple,  $n=24$ ), short-lead burst (SL, brown,  $n=27$ ) and long-lead burst (LL, green,  $n=60$ ) MFs to saccades of different peak velocities (PV, see insets for average velocity profiles), represented by different shades. **d, e, f** Average peak firing rate as a function of saccade peak velocity (bin size=20 deg/s) for each MF category. Linear regression parameters: Burst-tonic:  $p=0.012$ ,  $R^2=0.85$ ; Short-lead burst:  $p=0.01$ ,  $R^2=0.85$ ; Long-lead burst:  $p=0.001$ ,  $R^2=0.95$ . **g, h, i** Average burst offset relative to saccade onset as a function of saccade duration (calculated from velocity bins) for each MF category. Linear regression parameters, Burst-tonic:  $p=0.18$ ,  $R^2=0.21$ ; Short-lead burst:  $p=0.01$ ,  $R^2=0.02$ ; Long-lead burst:  $p=0.22$ ,  $R^2=0.44$ . Solid gray lines represent the linear regression fits. Dark and light-colored bins correspond to the high and low peak velocity bins, respectively, for which population responses in a, b and c are plotted for comparison. Data are mean $\pm$ SEM.

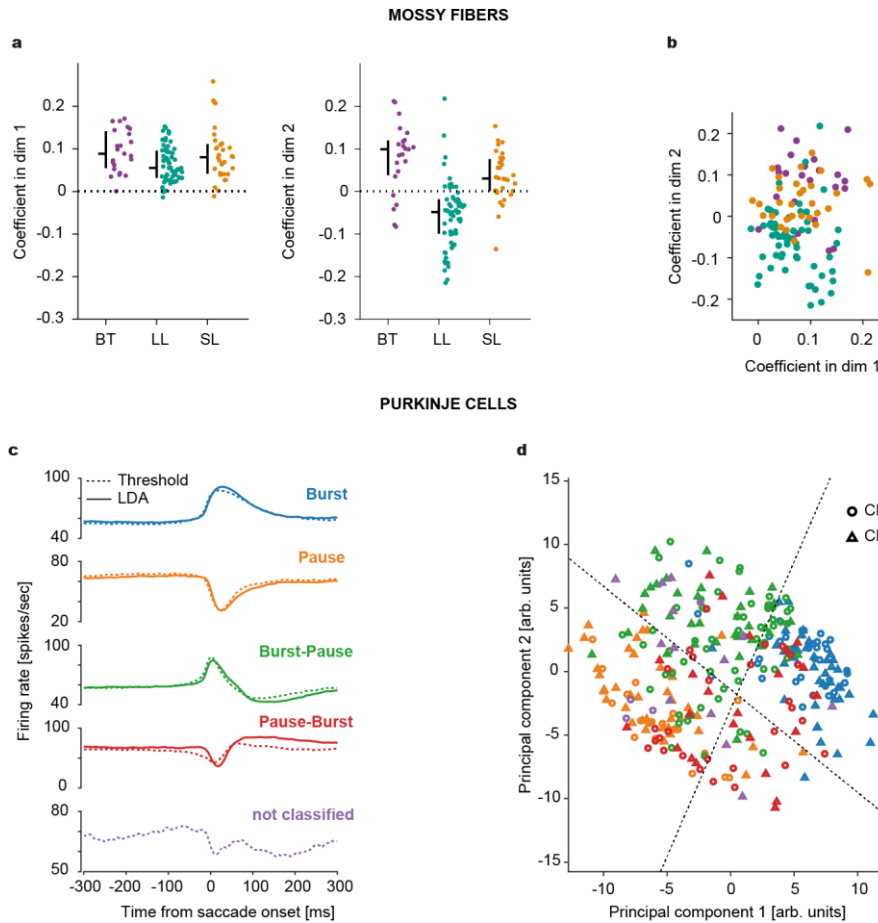43  
44

45 **Supplementary figure 2.** MF and PC units appear continuous in their distributions. **a**  
 46 Coefficients of MFs for the first (Left) and second (Right) dimension in the MF manifold.  
 47 Horizontal bar: median. Vertical bar: Range from the first to third quantile. **b** 2D scatterplot for  
 48 the coefficients in a. Note a nearly continuous distribution of data points with significant  
 49 overlaps between BT (n=24 units), SL (n=27 units) and LL (n=60) MF types (denoted by  
 50 colors). **c** Average firing response of all PCs categorized into burst (n=107 units; blue), pause  
 51 (n=99; orange), burst-pause (green; 72) and pause-burst (n=24; red) types by threshold-based  
 52 labeling (dashed lines) and linear discriminant analysis (LDA). Purple dashed lines indicate  
 53 the average response of those PCs units (n=17) which could not be classified into any of the  
 54 four categories by the threshold-based method. **d** 2D scatterplot of the coefficients of first two  
 55 principal components identified by the PCA for individual PC units recorded for centrifugal (CF,  
 56 circles) and centripetal (CP, triangles) saccades. Dashed lines indicate the decision  
 57 boundaries estimated by the LDA. Colors represent the PC category. Note, the overlap  
 58 between different categories.

60

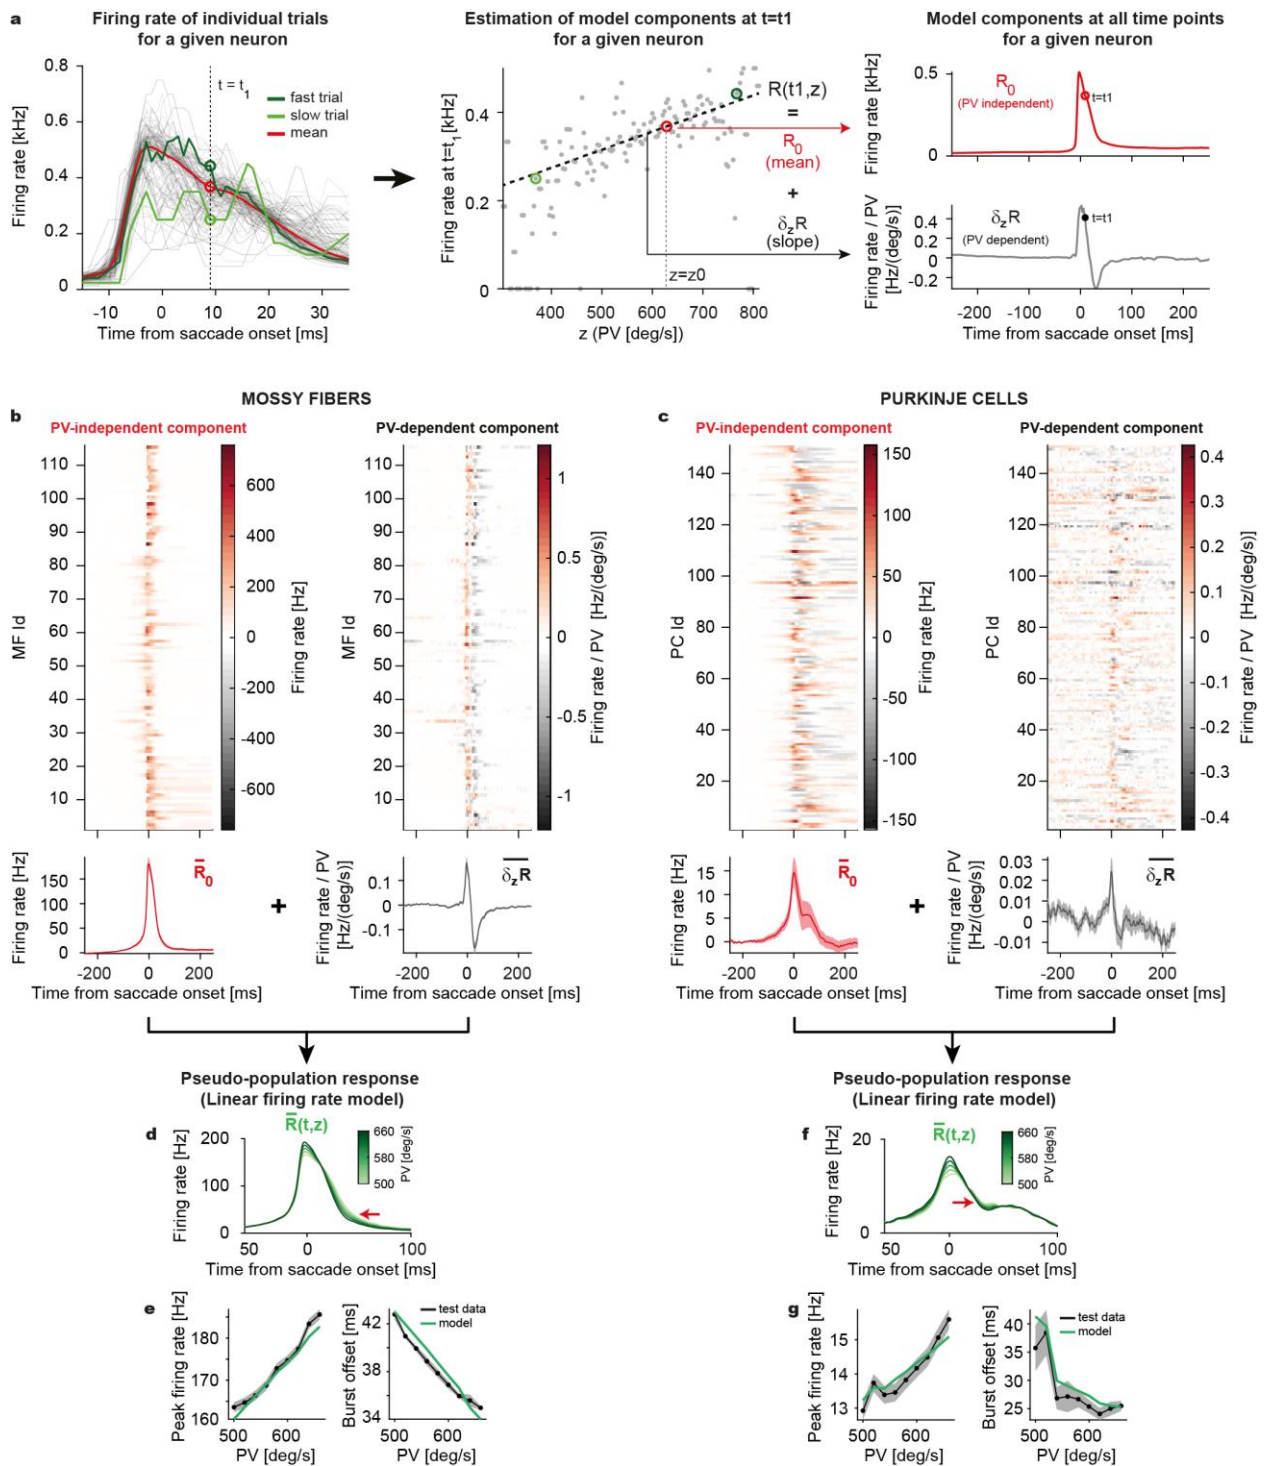

61  
62  
63  
64  
65  
66  
67  
68  
69  
70  
71  
72  
73

**Supplementary figure 3.** MF and PC-SS linear firing rate models. **a** Schematic illustration showing the steps involved in the construction of a rate model for individual (MF and PC) units/neurons using PV as the control kinematic parameter for the model. From the time-dependent firing rate estimations for individual trials of a given unit (Left), we create the linear regression model of movement kinematics, such as PV, versus firing rates at each time point (Middle). For example, given a linear dependence of MF or PC-SS firing rates on saccade PV, a randomly chosen saccade with high PV will be associated with higher firing rates (fast trial, dark green) as compared to a low PV saccade (slow trial, light green) and the difference between firing rates will be more pronounced during the initial phase of a saccade. Also, the slopes of regression will be much steeper at time points that fall within the peri-saccadic period

74 In pre- and post-saccadic periods, where fast and slow trials can no longer be differentiated  
75 by PV, the differences in firing rates will also eventually disappear and the slopes will also be  
76 flatter. From the center (mean) and slope of the result, we obtain the kinematics-independent  
77 and dependent components (Right). **b,c** Top: Heat-map showing PV-independent ( $\mathbf{R}_0$ ) and  
78 dependent components ( $\partial_{PV}\mathbf{R}$ ) for individual MF (b) and PC models (c). Bottom: Population  
79 averages. The baseline firing rates are subtracted. **d** Pseudo-population average firing rate  
80 for different PVs, computed from MF models in **b**. The red arrow indicates the point of burst  
81 offset. **e** Average peak firing rate (Left) and burst offset time (Right) vs PV from the models  
82 and test data. Goodness of fit:  $R^2 = 0.929 \pm 0.005$  (Left),  $0.887 \pm 0.026$  (Right). **f,g** Same plots  
83 as d,e but for PCs.  $R^2 = 0.809 \pm 0.023$  (Left),  $0.619 \pm 0.095$  (Right). Note that using the PV-and-  
84 duration model did not significantly improve the predictions in e,g: peak firing rate vs PV, MFs:  
85  $R^2 = 0.929 \pm 0.005$ , PCs:  $R^2 = 0.791 \pm 0.017$ ; burst offset vs PV, MFs:  $R^2 = 0.892 \pm 0.021$ ; PCs:  
86  $R^2 = 0.702 \pm 0.05$ . Data are mean  $\pm$  SEM.

87  
88  
89  
90  
91  
92  
93  
94  
95  
96  
97  
98  
99  
100  
101  
102  
103  
104  
105  
106  
107  
108  
109  
110  
111  
112  
113  
114  
115  
116  
117  
118  
119  
120  
121  
122  
123  
124  
125  
126  
127

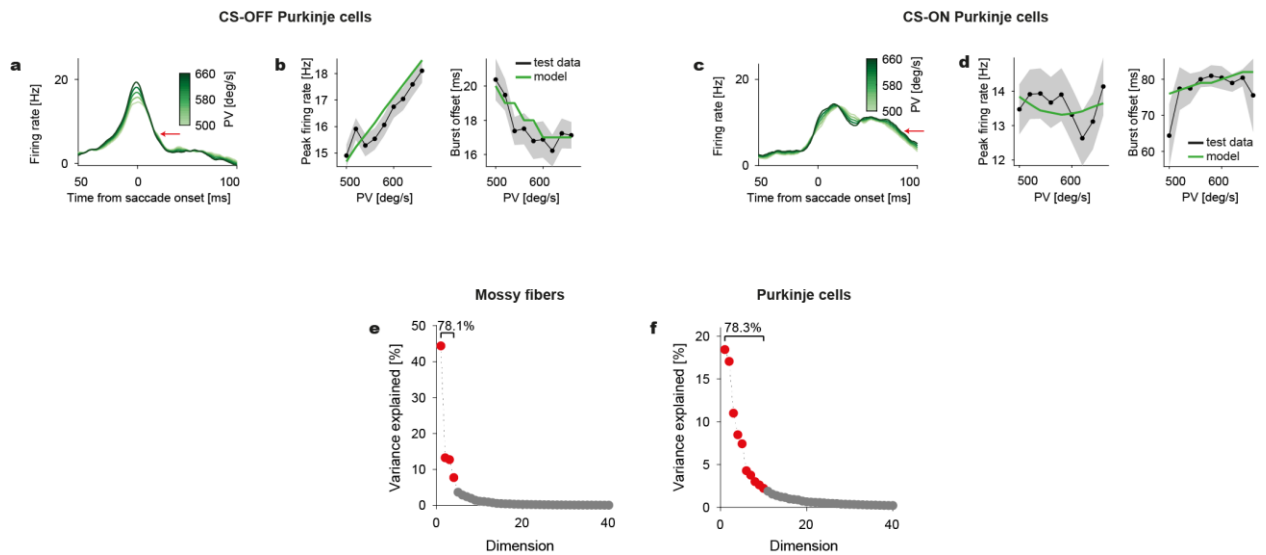

128  
129

130 **Supplementary figure 4.** Pseudo-population SS response for CS-ON and CS-OFF  
 131 population of PCs. **a** PV-dependent population average firing rates. The red arrow indicates  
 132 the point of burst offset. **b** Average peak firing rate (Left) and burst offset time (Right) versus  
 133 PV from the models and test data in CS-OFF direction. Goodness of fit:  $R^2 = 0.689 \pm 0.051$   
 134 (Left),  $0.433 \pm 0.121$  (Right). **c** Same as a, but for CS-ON PCs. **d** Same plots as b but for CS-  
 135 ON PCs.  $R^2 = 0.018 \pm 0.033$  (Left),  $0.092 \pm 0.088$  (Right). The baseline rates are subtracted in  
 136 all data. **e, f** Variance explained by each dimension in the PCA analysis of the PV-dependent  
 137 components of the MF (e) and PC-SS models (f). Components with >78% are marked in red.  
 138 Data are mean  $\pm$  SEM. Note that we did not apply physiologically unjustifiable normalizations  
 139 to the PV-dependent components for MFs and PCs (inputs to the PCA) since individual units  
 140 exhibit different discharge rates.

141

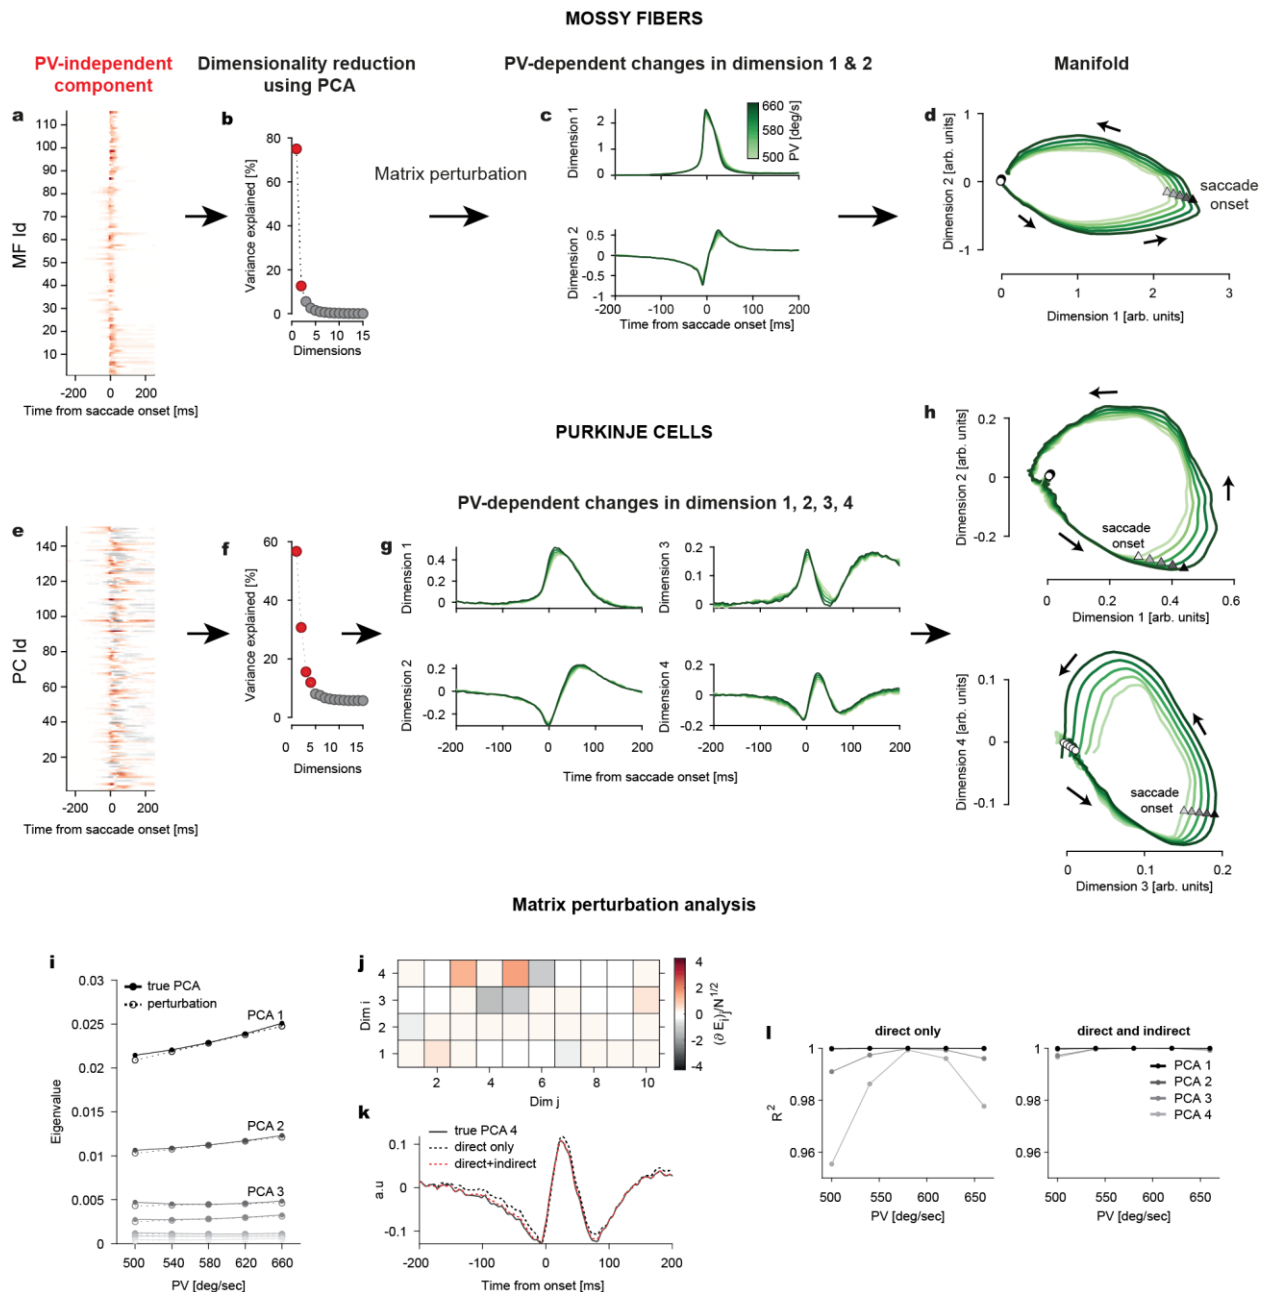

142  
143  
144  
145  
146  
147  
148  
149  
150  
151  
152  
153  
154  
155  
156  
157  
158  
159

**Supplementary figure 5.** Step-by-step procedure for identifying manifolds. **a** PV-independent components of all MF units (parameter: PV). First, PCA is performed on the average PV-independent components of individual MF units. **b** The first two principal components (or dimensions, red dots) of the PV-independent components explain a dominant fraction of cell-to-cell variability. **c** Matrix perturbation analysis (see **Methods** and **Supplementary Methods**) computes PV-dependent changes in the first two dimensions, plotted against time. **d** MF manifolds are identified by plotting the first two dimensions against each other for different values of PV (shades of green). Note the separation of curves, depicting increase in manifold size, with increments in PV, both before and after saccade onset (triangles). Arrows indicate the direction of rotation. **e-h** Same as a-d, for PCs. Here, four dimensions explain majority of cell-to-cell variability. Note how the differences in manifold, in the first two dimensions, are limited to periods after saccade onset, whereas in the third and the fourth dimension, changes also appear before saccade onset. The trajectories for the third and fourth dimensions (h, bottom) are plotted only until 50 ms after saccade onset to highlight the changes occurring before saccade onset. **i-l** Approximation of the movement parameter-dependent manifolds,

160 based on the matrix perturbation theory (**Equation 2** and **Supplementary Methods**), provides  
161 good accuracy. For different PVs, the true eigenvalues from PCA of the PC-SS data (solid)  
162 match the predictions of the matrix perturbation theory (dotted) well (**i**). The PV-dependent  
163 perturbation of the PCA eigenvectors (row) get significant contributions from a limited number  
164 of dimensions in the unperturbed eigenvectors (column). The coefficients (color) are  
165 normalized by  $N^{1/2}$ , where  $N = 151$  is the number of PCs (**j**). Therefore, even when PV  
166 significantly deviates from the mean value (here  $PV = 500^\circ/s$  in **k**), Equation 2 (red dots)  
167 provides a good approximation of the principal components (here the fourth dimension; black  
168 solid) while ignoring the eigenvector perturbation (**j**) (black dotted; see **Supplementary**  
169 **Methods**) will lead to inaccuracy (**k**). This holds for all the principal components of the PC SS  
170 data and a wide range of PVs (**l**).  
171  
172  
173  
174  
175  
176  
177  
178  
179  
180  
181  
182  
183  
184  
185  
186  
187  
188  
189  
190  
191  
192  
193  
194  
195  
196  
  
197



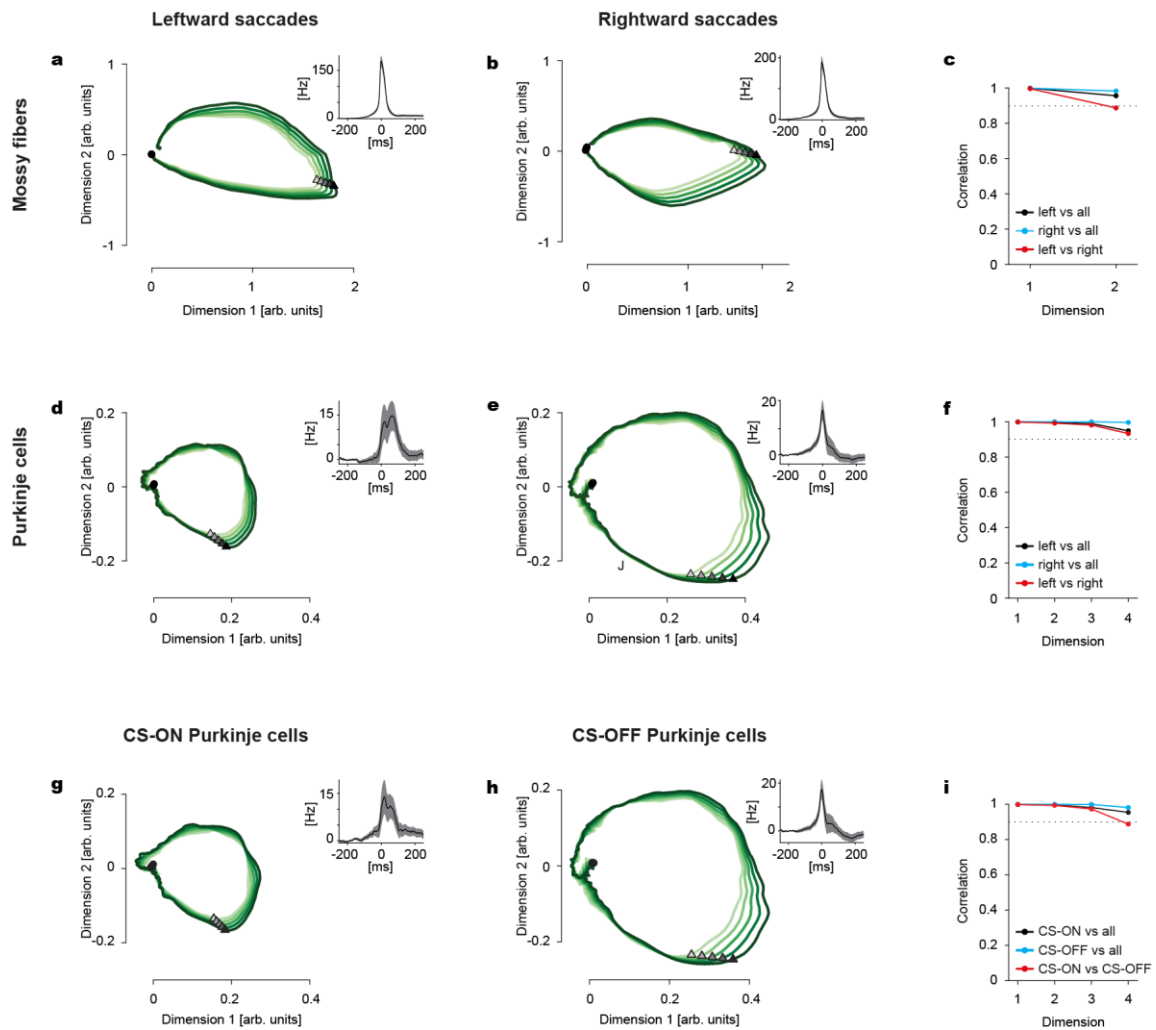

198

199

200 **Supplementary figure 6.** MF and PC-SS firing rate models and manifolds for different eye  
 201 movement directions. **a,b** 2D plots of the MF manifolds from the left- and right-directed  
 202 saccades. Insets show the population average of the PV-independent components of all MF  
 203 firing rate models (control parameter: PV). **c** Canonical correlation of each dimension in the  
 204 MF manifold between the left and right directions. Dotted line represents correlation=0.9. **d-f**  
 205 Same plots as a-c for PC-SS manifolds. **g-h** 2D manifolds of PC-SSs separately for a  
 206 population of CS-ON and CS-OFF PCs. Note that the similarity in d and e to g and h,  
 207 respectively, is because most PCs had their CS-ON in leftward direction and CS-OFF in the  
 208 rightward direction. **i** Same as f, but for PCs.

209

210

211

212

213

214

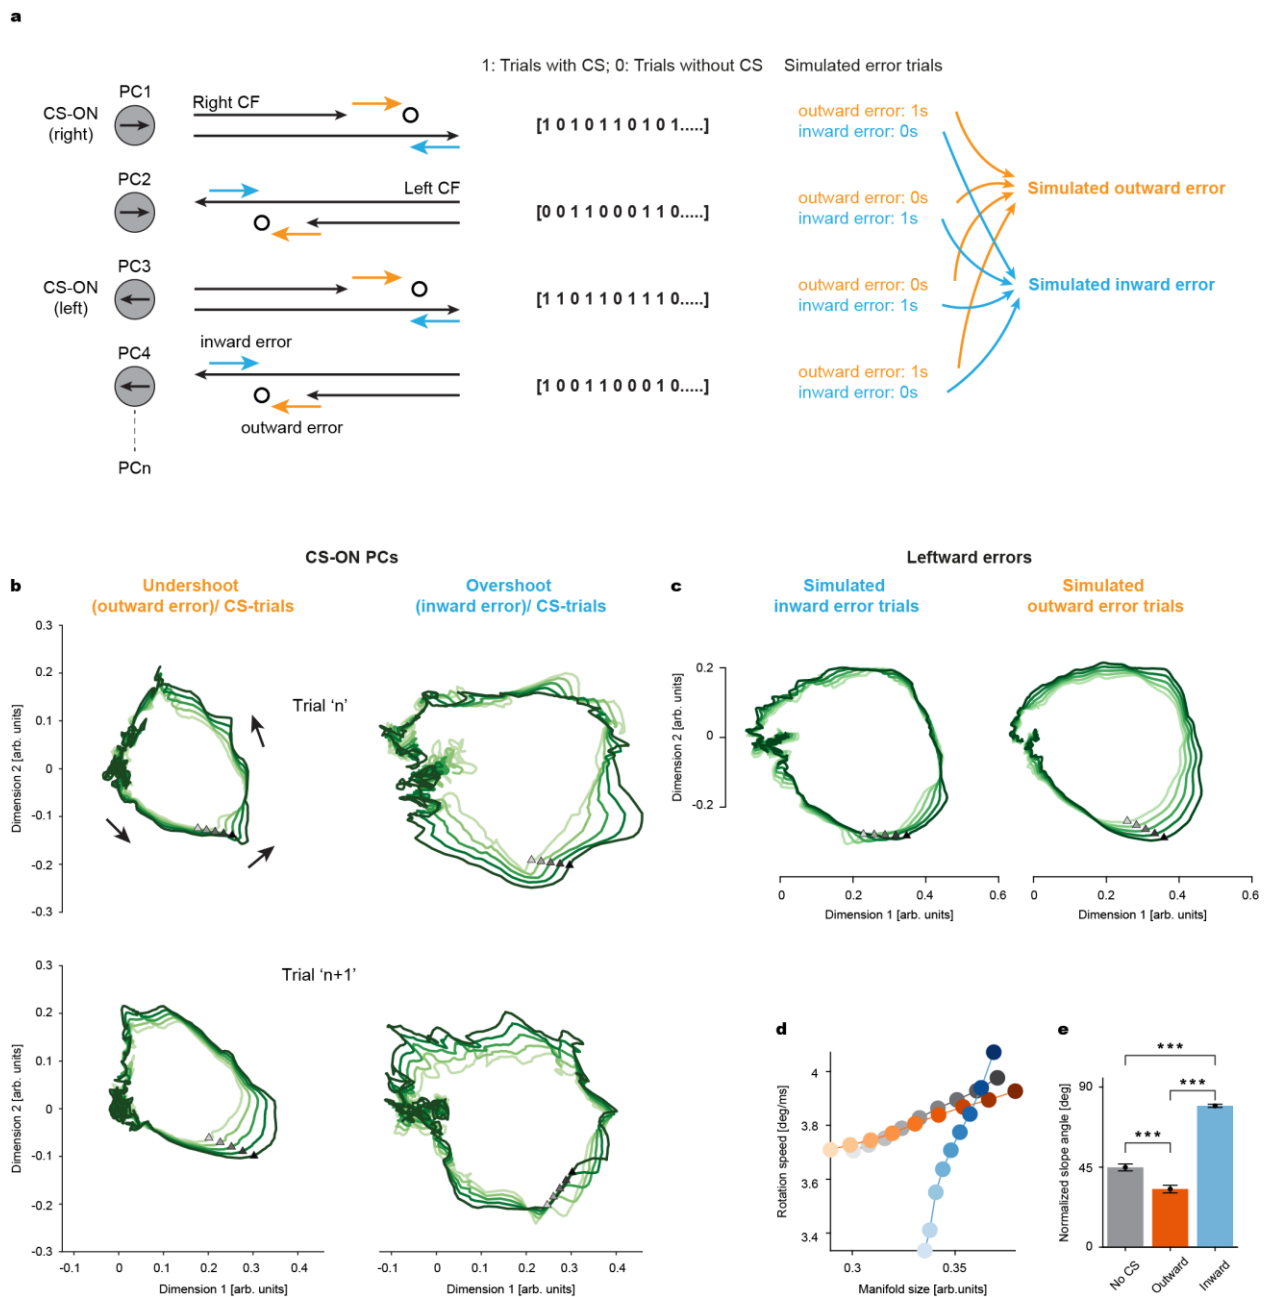

215  
216

217 **Supplementary figure 7.** CSs influence PC-SS manifolds differently, depending on the error  
 218 type, irrespective of its direction. **a** Illustration showing simulation of inward and outward  
 219 errors. Gray circles with arrows represent individual PCs with preferred error direction (CS-  
 220 ON) Black arrows indicate over- and undershooting primary saccades, which could lead to  
 221 inward (blue arrows) and outward errors (orange arrows) in individual recording sessions.  
 222 Trials with CS activity (i.e., 'CS-trials') within the post-saccadic period of 50-140 ms are  
 223 labelled as 1, and 0 otherwise ('no CS-trials'). Depending on a PC's CS-ON direction, every  
 224 'CS-trial' is hypothesized to report an inward or outward error, and every 'no CS-trial' should  
 225 report error in the opposite direction, regardless of whether these errors actually occur or not.  
 226 We did this for every PC and combined all trials (with and without CSs) that reported outward  
 227 and inward errors, separately, to determine the influence of CS in the simulated inward and  
 228 outward error conditions. **b** Up: Manifolds when outward (left) and inward (right) errors  
 229 occurred in trial 'n' accompanied by CS firing in the post-saccadic period. Down: Manifolds in  
 230 the subsequent trial 'n+1' change differently for outward and inward errors, like those for  
 231 simulated error trials shown in Fig. 5b. Filled triangles are saccade onsets and black arrows

232 indicate the direction of rotation for all manifolds. **c** Manifolds for simulated post-inward and  
233 post-outward error trials controlled for error direction (i.e., Leftward errors). **d** Rotation speed  
234 as a function of manifold size for simulated post-inward (blue), post-outward (orange) and no-  
235 CS control (gray) trials. **e** A comparison of normalized slope angles for each condition. Note  
236 that the error-type specific changes in manifolds are preserved, i.e., an outward error-related  
237 increase in manifold size (indicated by the relatively flatter slope of the orange curve as  
238 compared to No-CS) and inward-error related change in rotation speed (indicated by relatively  
239 steeper slope as compared to the No-CS condition), despite the error vector pointing in the  
240 same left direction. Data are jackknife mean $\pm$ SEM from n=151 PCs. T-value (No-CS,  
241 Outward) =5.93, p=9.88x10<sup>-9</sup>; T-value (Outward, Inward) = -28.28, p=1.59x10<sup>-62</sup>; T-value (No-  
242 CS, Inward) =-23.03, p=1.41x10<sup>-51</sup>. P-values are from one-sided Student *t*-tests.  
243

244

245

246

247

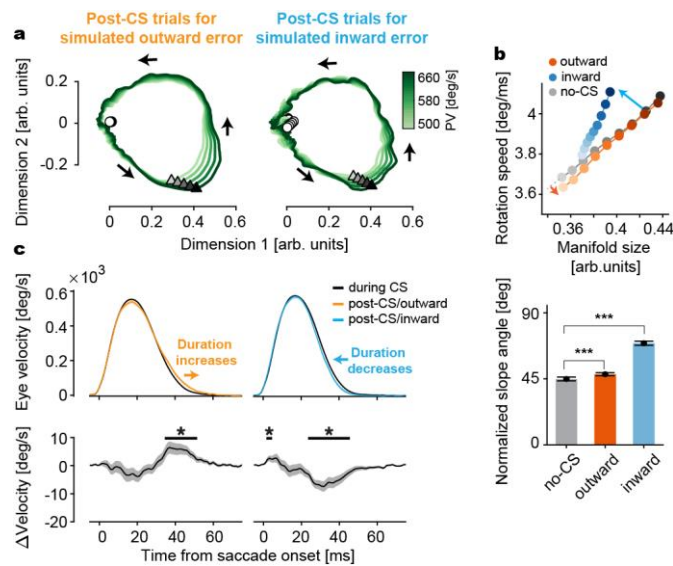

249

250

251 **Supplementary figure 8.** Influence of CSs during 140-250 ms from saccade offset on  
 252 subsequent trial's PC-SS manifolds for simulated inward and outward errors. **a** Left: PC  
 253 manifolds reflecting the combined influence of simulated outward errors on subsequent trials.  
 254 Right: Same as left, but for inward errors. **b** Top: Manifold size versus rotation speed after the  
 255 outward (orange) and inward (blue) error-encoding CS-trials, and after no-CS trials (grey).  
 256 Color bar gradient represents PV from 500 deg/s (brightest) to 660 deg/s (darkest). Bottom:  
 257 Comparison of normalized slope angles for each condition. Data are jackknife mean±SEM  
 258 from n=151 PCs. T-val (No-CS, Outward) = -2.71; p=3.81×10<sup>-3</sup>, T-val (Outward, Inward) = -  
 259 17.18; p=1.22×10<sup>-37</sup>, T-val (No-CS, Inward) = -17.77; p=4.00×10<sup>-39</sup>. P-values are from one-  
 260 sided Student *t*-tests. **c** Top: Average saccade velocity profiles in the CS (black) and post-CS  
 261 trials (colored) for the simulated outward (Left) and inward (Right) errors. For highlighting the  
 262 differences in velocity profiles, colored lines represent the cumulative effect of five CSs. Note,  
 263 how both inward and outward errors are corrected by changing the duration of the subsequent  
 264 saccade, as suggested by relatively steeper slopes (or larger slope angles) in inward and  
 265 outward error conditions shown in b. Bottom: Average eye velocity change from the CS to  
 266 post-CS trials. Data are mean±SEM. \*: p<0.05 (two-sided Student *t*-test).

267

268

269

270

271

272

273

274

275

276

277

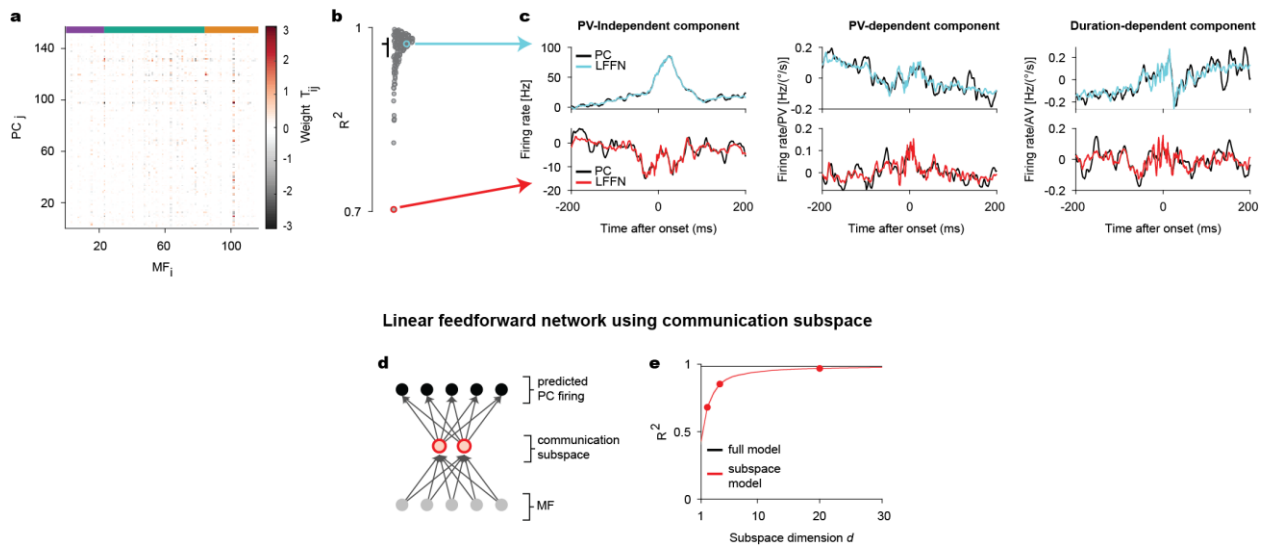

278  
 279  
 280  
 281  
 282  
 283  
 284  
 285  
 286  
 287  
 288  
 289  
 290  
 291  
 292

**Supplementary figure 9.** Linear feed-forward network (LFFN) model for MF-to-PC transformation with PV and duration dependence. **a** Weight matrix of the MF-to-PC network model. **b** Goodness of fit for individual PCs. Colored circles represent the examples in **c**. Horizontal bar: Median. Vertical bar: Range from the first to third quantile. **c** PV-independent (Left), PV- (Middle), and duration-dependent (Right) component of example PC-SS rate models (black) and prediction by LFFN (color). The baseline rates are subtracted in the PV-independent components. **d** A schematic illustration of the communication subspace model of MF-to-PC transformation. A communication subspace is a ( $d$ -dimensional) neural subspace of all MF activity that can best predict individual PC-SS rates given dimensionality  $d$ . See **Supplementary Methods** for how we found the communication subspace given  $d$ . **e** Goodness of fit for model prediction of PC-SS rates. Red dots represent  $d=2, 4, \text{ and } 20$ . Data are mean $\pm$ SEM.

293  
 294  
 295  
 296  
 297  
 298  
 299  
 300  
 301  
 302  
 303

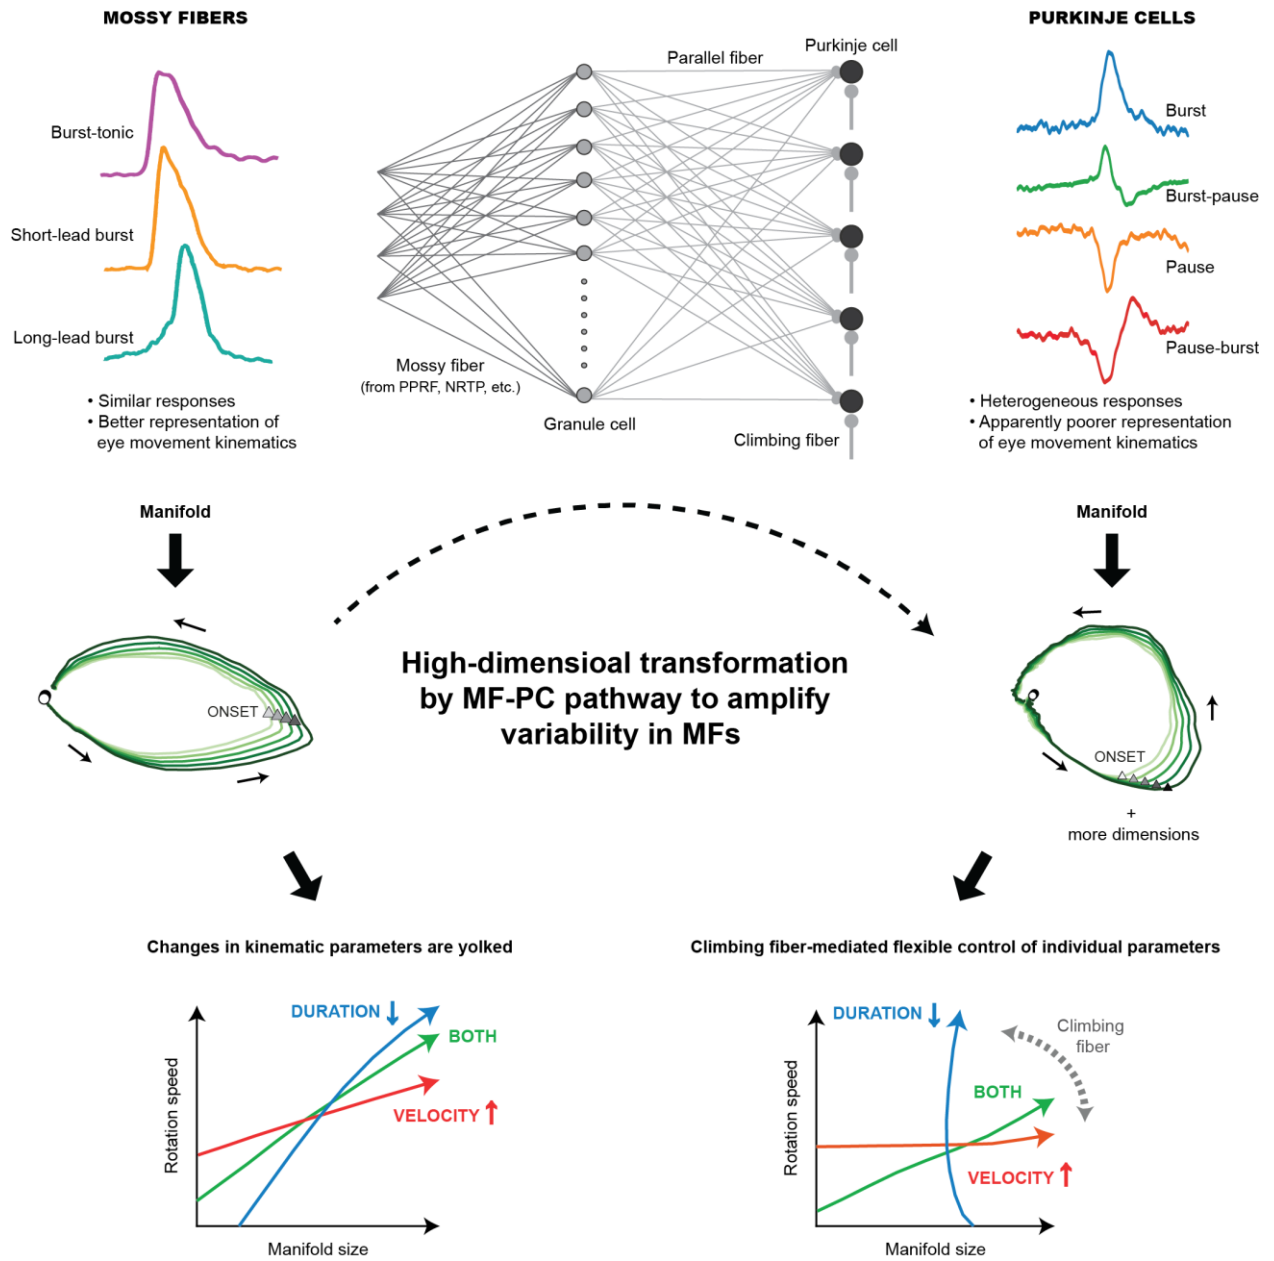

304

305

306 **Supplementary figure 10.** Summary figure.

307

308

309

310

311

## 312 **Supplementary methods**

### 313 **Fitting the linear rate model to data**

314 In the main text, we modeled the firing rate vector of a “pseudo-population” containing  $N$  number of neurons,  
315  $\mathbf{R}(t, \mathbf{z}) = [R_1(t, \mathbf{z}); R_2(t, \mathbf{z}); \dots; R_N(t, \mathbf{z})]$ , as

$$316 \quad \mathbf{R}(t, \mathbf{z}) = \mathbf{R}_0(t) + \sum_z \delta z \mathbf{R}_z(t).$$

317 where  $\mathbf{R}_0$  and  $\partial_z \mathbf{R}$  are the kinematics-independent and dependent part, respectively.  $\delta z = z - z_0$  is the  
318 deviation of  $z$  from the mean value of  $z$ ,  $z_0$ .

319 We fitted this model to the MF and PC data in the following way: We first estimated the firing rate at each trial  
320 by the fractional interspike interval method<sup>1</sup> ( $\tau=5$  ms). Other estimation methods, such as spike train  
321 smoothing by a Gaussian kernel, did not change the results. We sub-selected the firing rate data from  $t=-250$   
322 ms to 250 ms and subtracted the baseline firing, estimated by averaging the firing rates from  $t=-250$  ms to -150  
323 ms for each trial. By estimating the firing rate for every time bin ( $=1$  ms), our firing rate data became a  $(N_{\text{trial}}, T)$ -  
324 dimensional matrix for each neuron where  $N_{\text{trial}}$  is a number of trials and  $T=501$ , the length of each trial. As for  
325 the kinematic parameters, peak velocity (PV) and duration were computed from an eye movement velocity  
326 profile for each trial. However, the distribution of saccade duration was skewed and can lead to inaccuracy in  
327 regression. In estimation, therefore, we used average velocity (AV), defined by  $15^\circ/(\text{saccade duration})$ , as a  
328 regression variable, instead of duration since the AV distribution was significantly more symmetric. Finally, we  
329 performed the multivariate linear regression of the firing rate data for the kinematic parameters  
330 (**Supplementary fig. 3a**) for each unit to find the model components for all unit data (**Supplementary fig. 3b,c**).

331 We checked the explanation power of the model fitted to each unit data, especially  $\partial_z \mathbf{R}$ , by computing the  
332 Akaike information criterion (AIC). We found that AIC decreased significantly ( $P<0.01$ , Student t-test) in all units  
333 when the PV-dependence is added ( $\partial_{\text{PV}} \mathbf{R}$ ) (MF:  $\Delta\text{AIC}=-65.33 \pm 5.39$ , PC:  $-23.76 \pm 1.65$ ). Also, AIC significantly  
334 decreased ( $P<0.01$ , Student t-test) in a majority of the units (MF:  $n=99$ , PC: 83) when duration-dependence is  
335 augmented (MF:  $\Delta\text{AIC}=-23.60 \pm 3.03$ , PC:  $-3.41 \pm 0.48$ ). Therefore, we confirmed that the model captured the  
336 true kinematic parameter-dependent trial-to-trial firing rate variability, not the data noise.

337 We also tested whether the models can predict the average firing rate profile. To do so, we split each data set  
338 into two, the training and test data. Then, we first constructed the rate models based on the training data sets.  
339 All the trials in the test data are split based on PV bins whose centers were  $500^\circ/\text{s}$ ,  $520^\circ/\text{s}$ , ...,  $660^\circ/\text{s}$  and widths  
340 were  $50^\circ/\text{s}$ . We computed the PV-dependent average firing rate time series based on the estimated firing rates  
341 from the spike times of all the trials belonging to the PV bins. For each trial, we also computed the rate prediction  
342 from the training data and computed the prediction of the average firing rate in the same way as the test data  
343 (**Supplementary fig. 3d,f**). To test their agreement, we evaluated the peak firing rate and burst offset time as  
344 test measures for the average firing rates from the test data and model prediction (**Supplementary fig. 3e,g**).  
345 This procedure was carried out for two different types of models; first, those parametrized only by PV (i.e.,  
346  $\mathbf{z}=[\text{PV}]$ ) and the others with PV and duration (i.e.,  $\mathbf{z}=[\text{PV}, \text{AV}=15^\circ/(\text{duration})]$ ). We observed only an insignificant  
347 increase in the model performance by including duration as a parameter: With the PV-only model,  $R^2$  for the  
348 peak firing rate versus PV were  $0.929 \pm 0.005$  and  $0.892 \pm 0.023$  for MFs and PCs, respectively. For the burst  
349 offset versus PV,  $R^2=0.887 \pm 0.026$  for MFs and  $0.619 \pm 0.095$ . With the PV-and-duration model,  $R^2$  for the  
350 peak firing rate versus PV were  $0.929 \pm 0.005$  for MFs and  $0.791 \pm 0.017$  for PCs. For the burst offset versus PV,  
351  $R^2=0.892 \pm 0.021$  for MFs and  $0.702 \pm 0.05$  for PCs.

## 352 Dimensionality Reduction by Principal Component Analysis with Perturbation

353 We developed a simple variant of principal component analysis (PCA) to perform dimensionality reduction of  
 354 the population firing rate model. We first assume that, with any specific kinematic parameters (in the range of  
 355 experimental observations), we can find a good dimensionally reduced representation by performing PCA on  
 356 the population firing. Then, we find an approximation of the population firing and its change with kinematic  
 357 parameters by another dynamical process with lower dimensionality. Our goal is that if we perform PCA on this  
 358 approximated population firing, the result will be sufficiently close to that of the original population firing for  
 359 any kinematic parameters. In our experimental data, the trial-to-trial variabilities of kinematic parameters and  
 360 firing rate are relatively small. In this case, we can use the matrix perturbation theory to find such an  
 361 approximation of the population firing.

362 Our result can be summarized by Equation 2 in **Methods**: Given the kinematic parameter  $z$ , if the time-  
 363 dependent population firing  $\mathbf{R}(t, \mathbf{z})$  of  $N$  neurons is described by a linear model in Equation 1, it can be  
 364 approximated by the  $K$ -dimensional vectors  $\mathbf{P}_K$  and  $\partial_z \mathbf{P}_K$  ( $K < N$ ) as

$$365 \quad \begin{aligned} \mathbf{R}(t, \mathbf{z}) &\approx \mathbf{W}(\mathbf{P}_K + \sum_z \delta z \partial_z \mathbf{P}_K) + \mathbf{R}_\perp, \\ \partial_z \mathbf{P}_K &= \mathbf{W}^\dagger (\partial_z \mathbf{R}) + (\partial_z \mathbf{W})^\dagger (\mathbf{R}_0 - \mathbf{W} \mathbf{P}_K). \end{aligned} \quad (\text{S1})$$

366 where  $\mathbf{W}$  and  $\partial_z \mathbf{W}$  are the weight matrices, as long as  $\mathbf{R}_0$  admits  $\mathbf{R}_0 \approx \mathbf{W} \mathbf{P}_K$  (**Supplementary figure 5a,b** and  
 367 **e,f**) and  $\partial_z \mathbf{R}$  is sufficiently small. Furthermore, when we perform PCA on  $\mathbf{R}$ , the result is dominated by the first  
 368 term since  $\mathbf{R}_\perp$  makes a negligible contribution (see below). Therefore, we performed most of our manifold  
 369 analysis in terms of  $\mathbf{P}_K + \sum_z \delta z \partial_z \mathbf{P}_K$  (**Supplementary figure 5c,d** and **g,h**), without considering  $\mathbf{R}_\perp$ . An  
 370 exception is the dimensionally reduced MF firings given to the linear feed-forward network as inputs (**Figure 6**).  
 371 Here we use the full Eq. S1 for the approximate firing rates of individual neurons.

### 372 *Estimation of the model components*

373 In the first step, we performed PCA on the kinematic-independent component,  $\mathbf{R}_0$  (**Supplementary figure 5a,b**  
 374 and **e,f**). To do so, we computed the covariance matrix,  $\mathbf{C} = \text{Cov}[\mathbf{R}_0(t)]_t$  and its eigenvalues  $\{\lambda_n\}$  ( $\lambda_i \geq \lambda_j$  for  
 375  $i > j$ ) with the corresponding eigenvectors  $\mathbf{E} = [\mathbf{E}_1, \mathbf{E}_2, \dots, \mathbf{E}_N]$ . If the first  $K < N$  eigenvalues are dominant (see  
 376 below for the determination of  $K$ ), a dimensionally reduced approximation of  $\mathbf{R}_0$  can be obtained by the  
 377 projection of the population activity to a  $K$ -dimensional subspace of  $\mathbf{E}$  as

$$378 \quad \mathbf{R}_0 \approx \mathbf{W} \mathbf{P}_K, \quad \mathbf{P}_K = \mathbf{W}^\dagger \mathbf{R}_0, \quad \mathbf{W} = [\mathbf{E}_1, \dots, \mathbf{E}_K].$$

379 Then, in the second step, we approximated the full covariance matrix of  $\mathbf{R}(t, \mathbf{z})$  as

$$380 \quad \hat{\mathbf{C}} = \text{Cov}[\mathbf{R}(t, \mathbf{z})]_t \approx \mathbf{C} + \sum_z \delta z \partial_z \mathbf{C}, \quad \partial_z \mathbf{C} = \text{Cov}[\mathbf{R}_0, \partial_z \mathbf{R}]_t + \text{Cov}[\partial_z \mathbf{R}, \mathbf{R}_0]_t,$$

381 assuming that the kinematics-dependent part is sufficiently small. When the second  $\delta z$ -dependent terms are  
 382 small, they can be considered as small perturbations. In that case, the Rayleigh–Schrödinger perturbation theory  
 383 tells that eigenvalues  $\{\hat{\lambda}_n\}$  and eigenvectors  $\hat{\mathbf{E}} = [\hat{\mathbf{E}}_1, \dots, \hat{\mathbf{E}}_N]$  of  $\hat{\mathbf{C}}$  are approximately<sup>2,3</sup>,

$$384 \quad \begin{aligned} \hat{\lambda}_n &\approx \lambda_n + \sum_z \delta z \partial_z \lambda_n, & \partial_z \lambda_n &= \mathbf{E}_n^\dagger (\partial_z \mathbf{C}) \mathbf{E}_n, \\ \hat{\mathbf{E}}_n &\approx \mathbf{E}_n + \sum_z \delta z \partial_z \mathbf{E}_n, & \partial_z \mathbf{E}_n &= \sum_{k \neq n} \frac{\partial_z \lambda_n}{\lambda_n - \lambda_k} \mathbf{E}_k. \end{aligned} \quad (\text{S2})$$

385 **Supplementary figure 5i** shows an example of the PC data. The change in the eigenvalues of the covariance  
 386 matrix is well approximated by Eq. S2. **Supplementary figure 5j** shows how much contribution each  $\partial_z \mathbf{E}_i$  gets  
 387 from  $\mathbf{E}_j$ . We can see that  $\partial_z \mathbf{E}_3$  and  $\partial_z \mathbf{E}_4$  especially get significant contributions not only from the first four  $\mathbf{E}_j$ 's  
 388 but also from the higher ( $K > 4$ ) dimensional components.



389 Finally, by using the eigenvector perturbation in Eq. S2, we determined the rest of the components in Eq. S1,

$$390 \quad \begin{aligned} \partial_z \mathbf{W} &= [\partial_z \mathbf{E}_1, \partial_z \mathbf{E}_2, \dots, \partial_z \mathbf{E}_K], \\ \mathbf{R}_\perp &= -\sum_z \delta z \mathbf{E}_\perp (\partial_z \mathbf{E}_\perp)^\dagger \mathbf{W} \mathbf{P}_K, \end{aligned} \quad (\text{S3})$$

391 where  $\mathbf{E}_\perp = [\mathbf{E}_{K+1}, \dots, \mathbf{E}_N]$ , and  $\partial_z \mathbf{E}_\perp = [\partial_z \mathbf{E}_{K+1}, \partial_z \mathbf{E}_{K+2}, \dots, \partial_z \mathbf{E}_N]$ . We give the detailed derivation in the next  
392 section. Therefore,  $\partial_z \mathbf{W}$  represents a contribution from the eigenvector perturbation, and we will call it an  
393 *indirect projection*, while we will call  $\mathbf{W}^\dagger (\partial_z \mathbf{R})$  a *direct projection* term. On the other hand,  $\mathbf{R}_\perp$  represents the  
394  $K$ -dimensional approximation of  $\mathbf{R}_0$  rotating out of the  $K$ -subspace by perturbation and makes a negligible  
395 contribution when we perform PCA. **Supplementary figure 5k,l** show that we can well predict the PCA results of  
396 the population firing given the changes in a kinematic parameter, PV, without  $\mathbf{R}_\perp$ , while the indirect projection  
397 part can make a substantial contribution.

### 398 *Determination of K*

399 As a final note, we explain how we determined  $K$  in the first step: we first found  $K$  components that explained  
400 more than 85% of the total variance in  $\mathbf{R}_0$ . This criterion gave us  $K = 2$  and  $4$  for MFs and PCs, respectively. We  
401 also computed the participation ratio<sup>4,5</sup>,  $(\sum_n \lambda_n)^2 / \sum_n \lambda_n^2$ , which estimated  $K=2$  (MFs) and  $3$  (PCs), from  $\mathbf{R}_0$ .  
402 However,  $K=4$  for PCs was more robust when we varied kinematic parameters or hyperparameters such as the  
403 smoothing time scale for rate estimation. Finally, the cross-validation analysis for PCA<sup>6</sup> of  $\mathbf{R}_0$  also confirmed  $K=2$   
404 and  $4$ : We first randomly selected 70% of elements in  $\mathbf{R}_0$  matrix (“test data”) and replaced them by Gaussian  
405 random numbers, leaving the other 30% of the “training data” untouched. Using the data with random  
406 replacements, we repeatedly performed PCA until we got the stable prediction of the test data. Then, we  
407 computed the cross-validation error by the squared sum of the differences between the predicted and real test  
408 data. This procedure was repeated 200 times for each  $K$  from 2 to 20. We found that the cross-validation error,  
409 averaged over the repetitions, was minimal at  $K=2$  and  $4$  for the MF and PC data, respectively.

### 410 *Derivation of Eq. S1 and S3*

411 Given the perturbed eigenvectors in Eq. S2, the projection of the population activity to them,  $\hat{\mathbf{P}}$ , is

$$412 \quad \hat{\mathbf{P}} = \hat{\mathbf{E}}^\dagger \mathbf{R} \approx \mathbf{P} + \sum_z \delta z \{ \mathbf{E}^\dagger (\partial_z \mathbf{R}) + (\partial_z \mathbf{E})^\dagger \mathbf{R}_0 \}$$

413 where  $\mathbf{E} = [\mathbf{E}_1, \dots, \mathbf{E}_N]$  and  $\partial_z \mathbf{E} = [\partial_z \mathbf{E}_1, \dots, \partial_z \mathbf{E}_N]$ . If the left inverse of  $\hat{\mathbf{E}}^\dagger$  is  $\hat{\mathbf{U}} = \mathbf{U} + \sum_z \delta z \partial_z \mathbf{U} + O(\delta z^2)$ ,  
414 we get  $\mathbf{U} = \mathbf{E}$  and  $\partial_z \mathbf{U} = -\mathbf{E} (\partial_z \mathbf{E})^\dagger \mathbf{E}$ , from the condition  $\hat{\mathbf{U}} \hat{\mathbf{E}}^\dagger = \mathbf{1}$ .

415 Now we find the low dimensional representation  $\hat{\mathbf{P}}_K$  by keeping only the first  $K$  components of  $\hat{\mathbf{P}}$ , i.e.  $\hat{\mathbf{P}}_K = (\hat{\mathbf{P}})_K$   
416 where  $(\cdot)_K$  denotes selecting only the first  $K$  rows in a matrix. With  $\hat{\mathbf{W}} = [\hat{\mathbf{U}}_1, \hat{\mathbf{U}}_2, \dots, \hat{\mathbf{U}}_K]$  and again  $\mathbf{W} =$   
417  $[\mathbf{E}_1, \mathbf{E}_2, \dots, \mathbf{E}_K]$ ,

$$418 \quad \mathbf{R} \approx \hat{\mathbf{W}} \hat{\mathbf{P}}_K = \mathbf{W} \mathbf{P}_K + \sum_z \delta z \{ \mathbf{W} (\partial_z \mathbf{P})_K + (\partial_z \mathbf{U}_\parallel) \mathbf{P}_K \} + O(\delta z^2)$$

419 where  $\partial_z \mathbf{U}_\parallel = [\partial_z \mathbf{U}_1, \partial_z \mathbf{U}_1, \dots, \partial_z \mathbf{U}_K]$ .

420 Through a little algebra, this equation can be rewritten as

$$421 \quad \begin{aligned} \mathbf{R} \approx \mathbf{W} \mathbf{P}_K + \sum_z \delta z \mathbf{W} \mathbf{W}^\dagger (\partial_z \mathbf{R}) + \sum_z \delta z \mathbf{W} (\partial_z \mathbf{W})^\dagger (\mathbf{R}_0 - \mathbf{W} \mathbf{P}_K) \\ - \sum_z \delta z \mathbf{E}_\perp (\partial_z \mathbf{E}_\perp)^\dagger \mathbf{W} \mathbf{P}_K \end{aligned}$$

422 where  $\partial_z \mathbf{W} = [\partial_z \mathbf{E}_1, \partial_z \mathbf{E}_2, \dots, \partial_z \mathbf{E}_K]$ .  $\mathbf{E}_\perp$  and  $\partial_z \mathbf{E}_\perp$  are both orthogonal to the  $K$ -subspace as  $\mathbf{E}_\perp =$   
 423  $[\mathbf{E}_{K+1}, \dots, \mathbf{E}_N]$ , and  $\partial_z \mathbf{E}_\perp = [\partial_z \mathbf{E}_{K+1}, \partial_z \mathbf{E}_{K+2}, \dots, \partial_z \mathbf{E}_N]$ . Defining  $\mathbf{R}_\perp = -\sum_z \delta z \mathbf{E}_\perp (\partial_z \mathbf{E}_\perp)^\dagger \mathbf{W} \mathbf{P}_K$ , we reach Eq.  
 424 S1 and S3.

425

## 426 Alignment of Two Manifolds by Canonical Correlation Analysis

427 In the main text, we compared manifolds obtained from two or more different data sets, such as firings recorded  
 428 with the left-directed saccades and those with the right-directed ones. We used canonical correlation analysis  
 429 (CCA) to verify if a pair of manifolds can be related by a linear transformation<sup>7-9</sup>. We first used the CCA for the  
 430 kinematics-independent components of two data sets to find the best linear alignment transformation between  
 431 them. Then, we transformed the kinematics-dependent parts by the alignment transform and checked how well  
 432 they match with each other.

433 If there are two data called A and B, we denote the kinematics-independent components ( $\mathbf{P}_K$  in Eq. S1) of their  
 434 manifolds,  $\mathbf{P}_A$  and  $\mathbf{P}_B$ , respectively. Also, we discretize time and consider them as  $N \times T$  matrices instead of  
 435 time-dependent vectors, where T is the length of trials.

436 First, we perform the QR decomposition,

$$437 \quad \mathbf{P}_X^\dagger = \mathbf{Q}_X \mathbf{V}_X, \quad X = A, B.$$

438 From the singular value decomposition of the comparison matrix  $\mathbf{Q}_A^\dagger \mathbf{Q}_B = \mathbf{U}_A \mathbf{S} \mathbf{U}_B^\dagger$ , we obtain the transformation  
 439 matrices to the best aligned manifolds,  $\tilde{\mathbf{P}}_A$  and  $\tilde{\mathbf{P}}_B$ , as

$$440 \quad \tilde{\mathbf{P}}_X^\dagger = \mathbf{P}_X^\dagger \mathbf{M}_X, \quad \mathbf{M}_A = \mathbf{V}_X^{-1} \mathbf{U}_X, \quad X = A, B.$$

441 The diagonal elements of  $\mathbf{S}$  are correlations between  $\tilde{\mathbf{P}}_A$  and  $\tilde{\mathbf{P}}_B$ . We obtain a representation of  $\mathbf{P}_B$  aligned to A

$$442 \quad \mathbf{P}_{B \rightarrow A}^\dagger = \mathbf{P}_B^\dagger \mathbf{T}_{B \rightarrow A}, \quad \mathbf{T}_{B \rightarrow A} = \mathbf{M}_B \mathbf{M}_A^{-1} / N,$$

443 where  $N$  is a norm of  $\mathbf{M}_B \mathbf{M}_A^{-1}$  to maintain the size difference between two manifolds. Then, Eq. S1 becomes

$$444 \quad \begin{aligned} \hat{\mathbf{R}}_B &\approx \mathbf{W}_B \left( \mathbf{P}_B + \sum_z \delta z \partial_z \mathbf{P}_B \right) + \mathbf{R}_\perp \\ &= \mathbf{W}_B \mathbf{T}_{A \rightarrow B}^\dagger \mathbf{P}_{B \rightarrow A} + \sum_z \delta z \mathbf{W}_B \mathbf{T}_{A \rightarrow B}^\dagger \mathbf{T}_{B \rightarrow A}^\dagger \partial_z \mathbf{P}_B + \mathbf{R}_\perp \\ &= \mathbf{W}_{B \rightarrow A} \left\{ \mathbf{P}_{B \rightarrow A} + \sum_z \delta z \partial_z \mathbf{P}_{B \rightarrow A} \right\} + \mathbf{R}_\perp, \end{aligned}$$

445 where  $\mathbf{W}_{B \rightarrow A} = \mathbf{W}_B \mathbf{T}_{A \rightarrow B}^\dagger$  is a new weight matrix for  $\mathbf{P}_{B \rightarrow A}$  and  $\partial_z \mathbf{P}_{B \rightarrow A} = \mathbf{T}_{B \rightarrow A}^\dagger (\partial_z \mathbf{P}_B)$  is the aligned manifold  
 446 perturbation.

447

## 448 Linear Feed-forward Network (LFFN) Models

449 In the main text, we considered three different types of LFFN. They commonly had the movement kinematics-  
 450 independent and dependent components for output variables ( $\mathbf{Y}$ ,  $\partial_z \mathbf{Y}$ ) and input ( $\mathbf{X}$ ,  $\partial_z \mathbf{X}$ ). Then, we compute  
 451 the expectation value of the least-square error given the distribution of  $\mathbf{z}$ ,  $\rho(\mathbf{z})$ ,

452

$$\begin{aligned}
E(\mathbf{T}) &= \int d\mathbf{z} p(\mathbf{z}) \left\| \mathbf{Y} + \sum_z \delta_z \partial_z \mathbf{Y} - \mathbf{T} \left( \mathbf{X} + \sum_z \delta_z \partial_z \mathbf{X} \right) \right\|^2 \\
&= \int d\mathbf{z} p(\mathbf{z}) \|\mathbf{Y} - \mathbf{TX}\|^2 + \int d\mathbf{z} p(\mathbf{z}) \sum_z \delta_z (\partial_z \mathbf{Y}) \cdot \mathbf{TX} + (\mathbf{X} \leftrightarrow \mathbf{Y}) \\
&\quad + \int d\mathbf{z} p(\mathbf{z}) \sum_z \sum_{z'} \delta_z \delta_{z'} (\partial_z \mathbf{Y} - \mathbf{T} \partial_z \mathbf{X}) \cdot (\partial_{z'} \mathbf{Y} - \mathbf{T} \partial_{z'} \mathbf{X}).
\end{aligned}$$

453 We assume that  $p(\mathbf{z})$  is approximately the Gaussian distribution with zero mean. Then, we get the error function  
454 in Equation 3 in **Methods**,

455

$$E(\mathbf{T}) = \|\mathbf{Y} - \mathbf{TX}\|^2 + \sum_z \sum_{z'} \text{Cov}[z, z'] (\partial_z \mathbf{Y} - \mathbf{T} \partial_z \mathbf{X}) \cdot (\partial_{z'} \mathbf{Y} - \mathbf{T} \partial_{z'} \mathbf{X}).$$

456 In evaluating the performance, we measured the total variability by replacing the prediction ( $\mathbf{TX}$ ,  $\mathbf{T} \partial_z \mathbf{X}$ ) in  
457 Equation 3 by the mean  $\langle \mathbf{Y} \rangle$  and  $\langle \partial_z \mathbf{Y} \rangle$  and compared it to  $E(\mathbf{T})$  to evaluate the goodness of fit,  $R^2$ . To prevent  
458 overfitting, we used the LASSO scheme<sup>10</sup> to minimize  $E(\mathbf{T}) + \sum_{i,j} \lambda_i |T_{i,j}|$ . We used the MATLAB package *glmnet*<sup>11</sup>  
459 and chose optimal  $\lambda_i$  for each  $Y_i$  by finding where AIC minimizes.

460 The communication subspace model (**Supplementary fig. 8d-e**) was obtained by the rank-reduced regression<sup>12</sup>  
461 with the error function  $E(\mathbf{T})$ . We first performed the unconstrained optimization of  $E(\mathbf{T})$  to find the optimal  
462 least-square solution  $\mathbf{T}_{\text{OLS}}$ . Then, we computed the  $d$  principal components of the predictor,  $\mathbf{V}$ , and obtained the  
463 reduced-rank solution  $\mathbf{T}_{\text{RRR}} = \mathbf{V}\mathbf{V}^{\dagger}\mathbf{T}_{\text{OLS}}$ .

464

## 465 Supplementary references

- 466 1 Schwartz, A. B. Motor cortical activity during drawing movements: population representation during  
467 sinusoid tracing. *J Neurophysiol* **70**, 28-36 (1993). <https://doi.org/10.1152/jn.1993.70.1.28>  
468 2 Sakurai, J. J. & Napolitano, J. *Modern quantum mechanics*. Pearson new international, second edition.  
469 edn, (Pearson, 2014).  
470 3 Greenbaum, A., Li, R.-c. & Overton, M. L. First-order perturbation theory for eigenvalues and  
471 eigenvectors. *SIAM review* **62**, 463-482 (2020).  
472 4 Mazzucato, L., Fontanini, A. & La Camera, G. Stimuli Reduce the Dimensionality of Cortical Activity.  
473 *Front Syst Neurosci* **10**, 11 (2016). <https://doi.org/10.3389/fnsys.2016.00011>  
474 5 Litwin-Kumar, A., Harris, K. D., Axel, R., Sompolinsky, H. & Abbott, L. F. Optimal Degrees of Synaptic  
475 Connectivity. *Neuron* **93**, 1153-1164.e1157 (2017). <https://doi.org/10.1016/j.neuron.2017.01.030>  
476 6 Bro, R., Kjeldahl, K., Smilde, A. K. & Kiers, H. A. L. Cross-validation of component models: a critical look  
477 at current methods. *Anal Bioanal Chem* **390**, 1241-1251 (2008). <https://doi.org/10.1007/s00216-007-1790-1>  
478 7 Sussillo, D., Churchland, M. M., Kaufman, M. T. & Shenoy, K. V. A neural network that finds a  
480 naturalistic solution for the production of muscle activity. *Nat Neurosci* **18**, 1025-1033 (2015).  
481 <https://doi.org/10.1038/nn.4042>  
482 8 Gallego, J. A. *et al.* Cortical population activity within a preserved neural manifold underlies multiple  
483 motor behaviors. *Nat Commun* **9**, 4233 (2018). <https://doi.org/10.1038/s41467-018-06560-z>  
484 9 Gallego, J. A., Perich, M. G., Chowdhury, R. H., Solla, S. A. & Miller, L. E. Long-term stability of cortical  
485 population dynamics underlying consistent behavior. *Nat Neurosci* **23**, 260-270 (2020).  
486 <https://doi.org/10.1038/s41593-019-0555-4>  
487 10 Hastie, T., Tibshirani, R. & Friedman, J. H. *The elements of statistical learning : data mining, inference,*  
488 *and prediction*. 2nd edn, (Springer, 2009).  
489 11 Friedman, J., Hastie, T. & Tibshirani, R. Regularization Paths for Generalized Linear Models via  
490 Coordinate Descent. *J Stat Softw* **33**, 1-22 (2010).  
491 12 Semedo, J. D., Zandvakili, A., Machens, C. K., Byron, M. Y. & Kohn, A. Cortical areas interact through a  
492 communication subspace. *Neuron* **102**, 249-259. e244 (2019).
